# Supplementary material for: Rice flour-based nanostructures via a water-based system: transformation from powder to electrospun nanofibers under hydrogen-bonding induced viscosity, crystallinity and improved mechanical property
Source: Royal Society of Chemistry journal article supplement (doi:10.1039/c7ra01485f), 2017-01-01
Supplement: c7ra01485f1.pdf [file c7ra01485f1.pdf]

Supporting Information

**Rice flour-based nanostructure via water-based system: Transformation from powder to electrospun nanofibers under hydrogen-bonding induced viscosity, crystallinity and improved mechanical property**

Sarekha Woranuch,<sup>a</sup> Autchara Pangon,<sup>a</sup> Kantapat Puagsuntia,<sup>a</sup> Nakarin Subjaleearndee<sup>a</sup> and Varol Intasanta<sup>a\*</sup>

*<sup>a</sup>Nano Functional Textile Laboratory, National Nanotechnology Center, National Science and Technology Development Agency, 111 Phahonyothin Road, Klong Nueng, Klong Luang, Pathumthani, 12120, Thailand*

\*Corresponding author. *Tel.: +66 2 564 7100 ext. 6580; fax : +662 564 6981.*

*E-mail address: varol@nanotec.or.th*

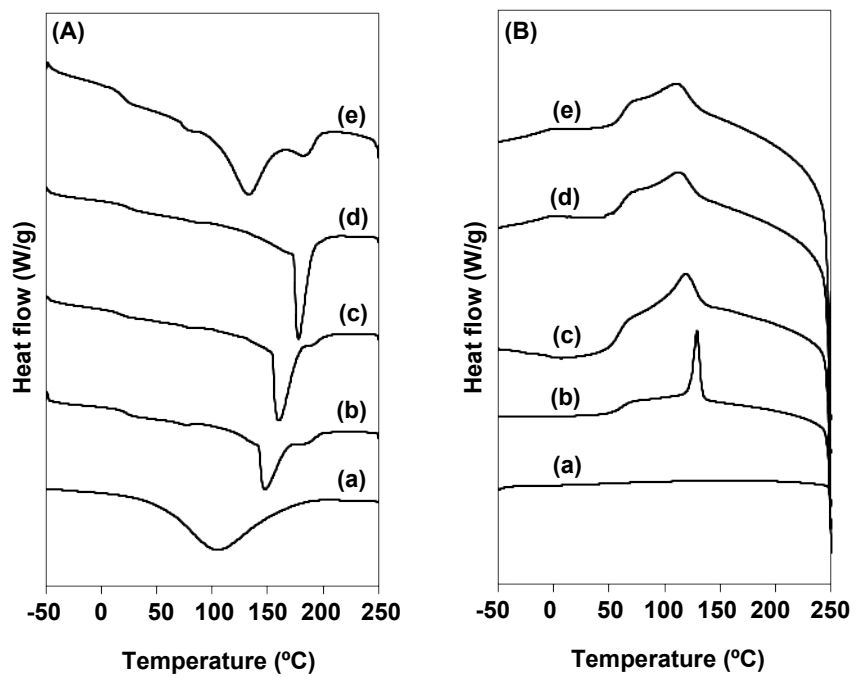

**Fig. S1** DSC thermograms (exo up) for (A) first heating scan and (B) cooling scan of : (a) rice flour; (b) polyvinyl alcohol (PVA) membrane; and (c)-(e) rice flour/PVA membranes at different contents of rice flour for (c) 12.5% w/w, (d) 25% w/w and (e) 37.5% w/w.
